# Supplementary material for: Atomic reconstruction and oxygen adsorption behavior of the pyrite (100) surface: a DFT study
Source: Royal Society of Chemistry journal article supplement (doi:10.1039/d3cp00039g), 2023-01-01
Supplement: d3cp00039g1.pdf [file d3cp00039g1.pdf]

## **Atomic reconstruction and oxygen adsorption behavior of pyrite (100) surface: A DFT study**

Manjiao Chen <sup>a,b</sup>, Xinjun Hu <sup>a</sup>, Xinjun Zhou <sup>a</sup>, Xiulan Li <sup>a</sup>, Jianping Tian <sup>a</sup>

<sup>a</sup> School of Mechanical Engineering, Sichuan University of Science & Engineering, Zigong 643000 China

<sup>b</sup> Faculty of materials science and engineering, Kunming University of Science and Technology, Kunming 650093 China

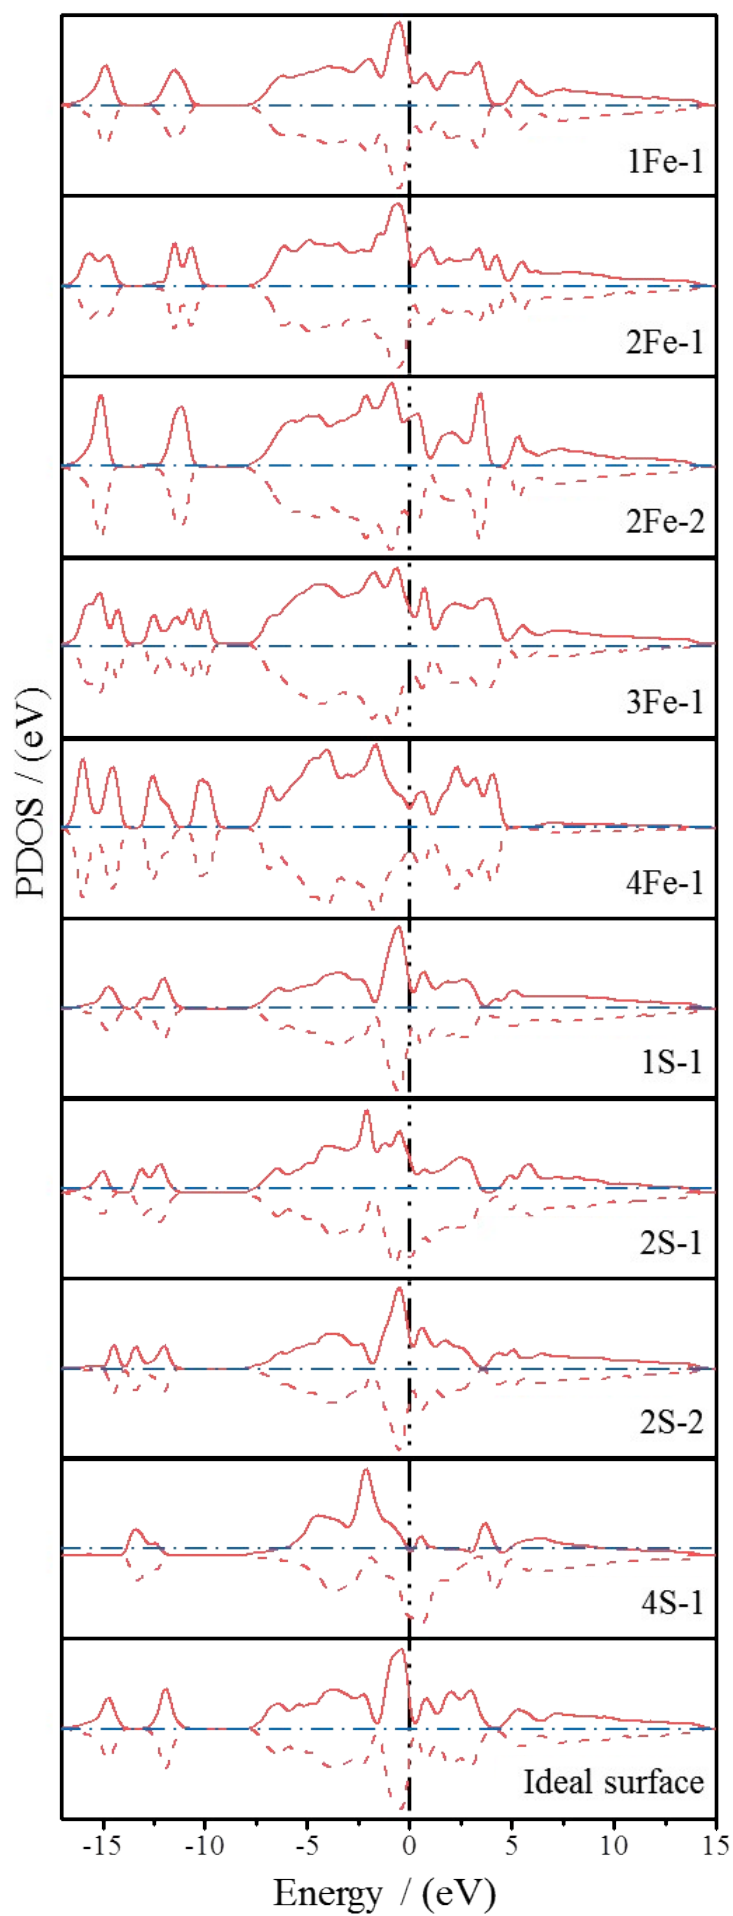

Fig S1 DOS of the atom on reconstructed surface(The solid line represents the spin up, and dotted line represents the spin down)

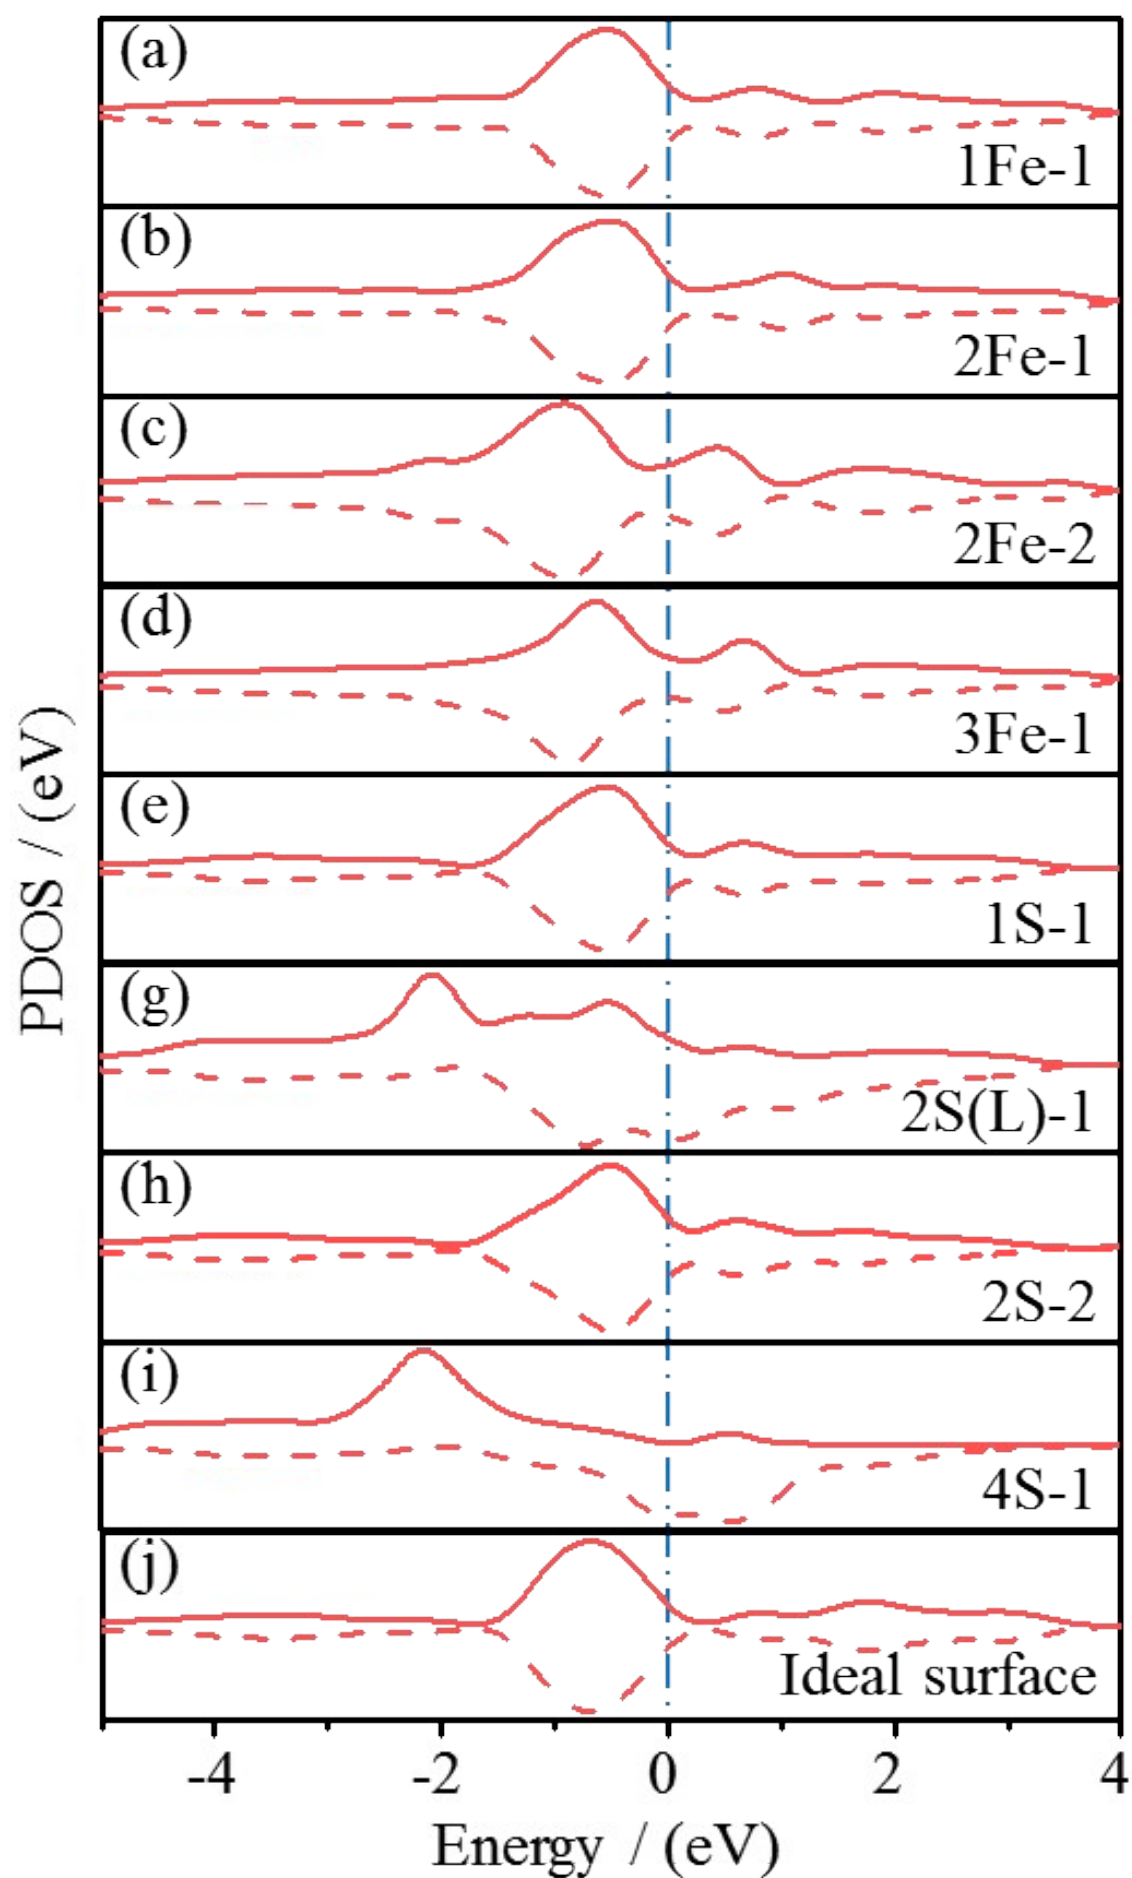

Fig S2 PDOS of d-band of Fe atom on reconstructed surface(The solid line represents the spin up, and dotted line represents the spin down)

Table S1 Mulliken charge of S and Fe atom on reconstructed surface (e)

| Configuration | S     | Fe   |
|---------------|-------|------|
| 1Fe-1         | -0.07 | 0.14 |
| 2Fe-1         | -0.05 | 0.18 |
| 2Fe-2         | -0.07 | 0.23 |
| 3Fe-1         | -0.04 | 0.26 |
| 4Fe-1         | 0.00  | 0.00 |
| 1S-1          | -0.09 | 0.11 |
| 2S-1          | -0.13 | 0.18 |
| 2S-2          | -0.11 | 0.13 |
| 4S-1          | -0.25 | 0.28 |

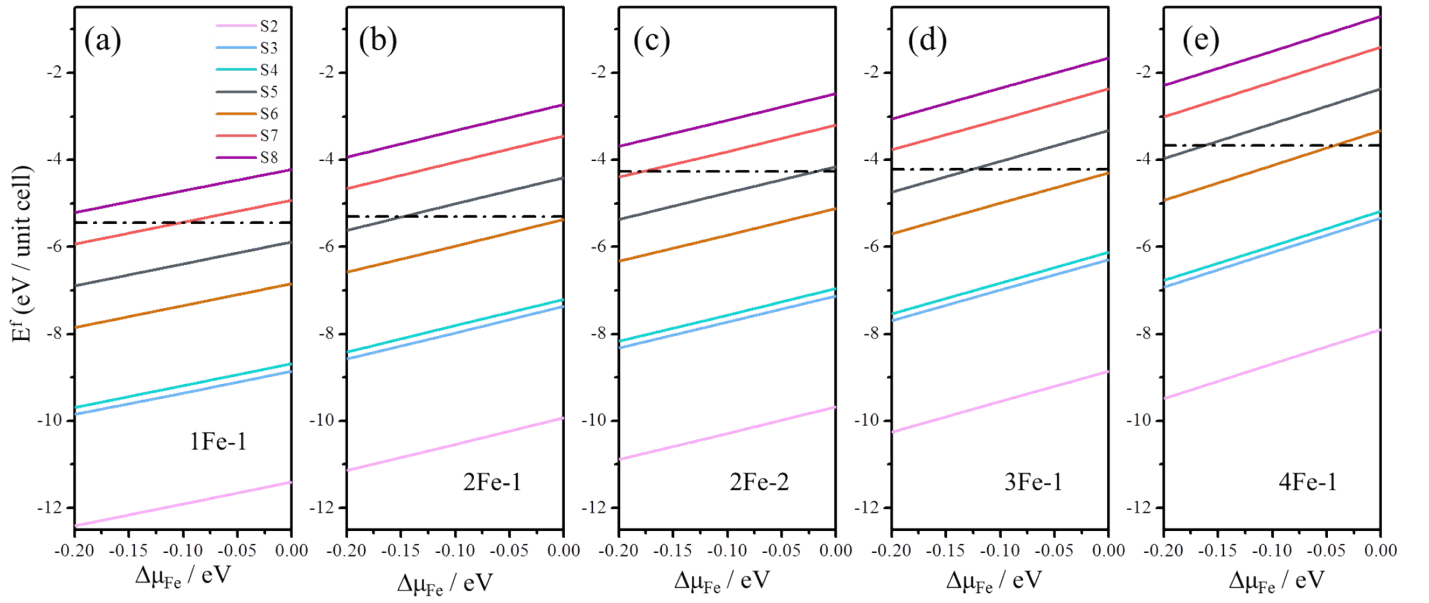

Fig. S3 Formation energies  $E^f$  (in eV / unit cell) for surfaces with different configuration when FeS as equilibrium phase and  $S_2$  molecules serve as the reference potential energy of S atom (dashed lines represents the binding energy)

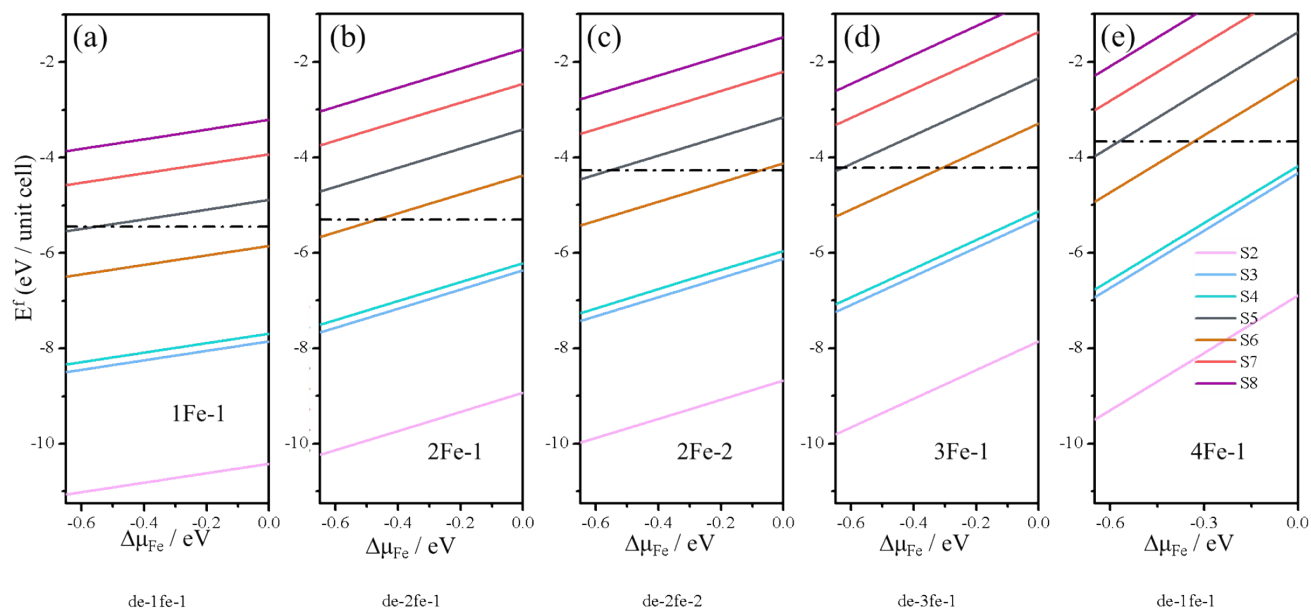

Fig. S4 Formation energies  $E^f$  (in eV / unit cell) for surfaces with different configuration when  $\text{FeS}_2$  as equilibrium phase and  $\text{S}_8$  molecules serve as the reference potential energy of S atom (dashed lines represents the binding energy)

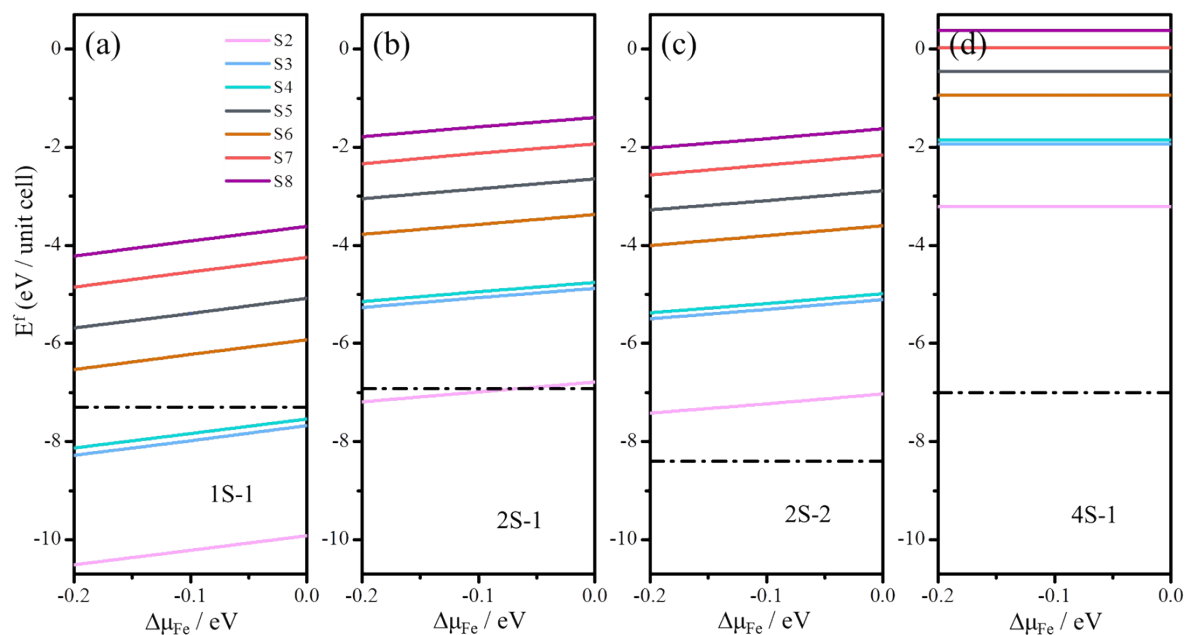

Fig. S5 Formation energies  $E^f$  (in eV / unit cell) for surfaces with different configuration when  $\text{FeS}$  as equilibrium phase and  $\text{S}_2$  molecules serve as the reference potential energy of S atom (dashed lines represents the binding energy)

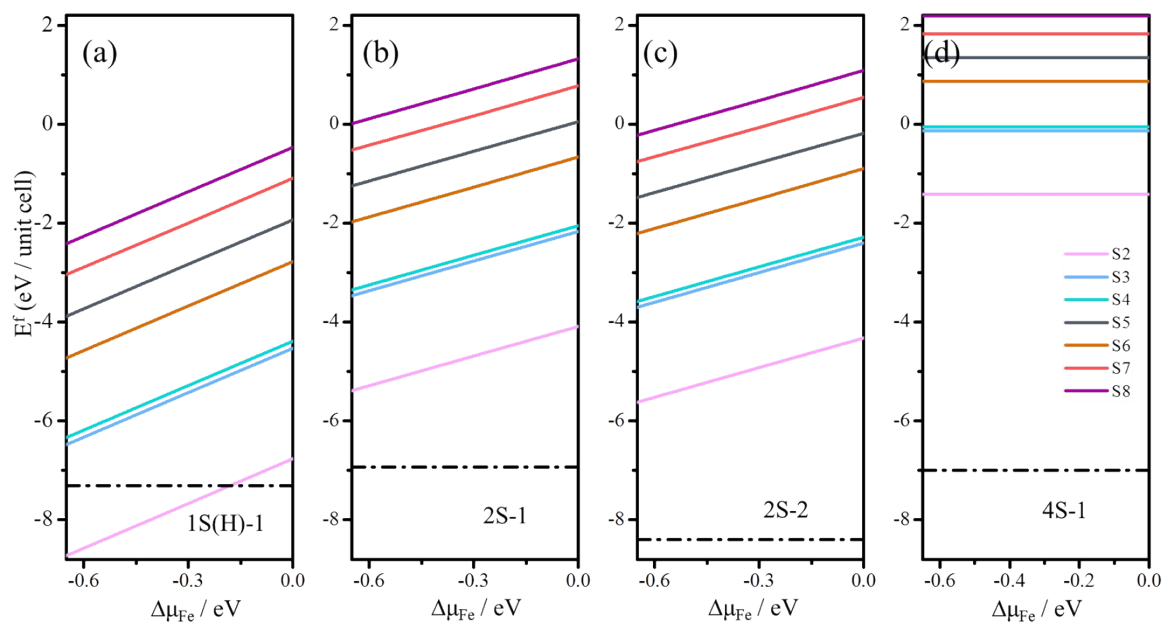

Fig. S6 Formation energies  $E^f$  (in eV / unit cell) for surfaces with different configuration when  $\text{FeS}_2$  as equilibrium phase and  $\text{S}_8$  molecules serve as the reference potential energy of S atom (dashed lines represents the binding energy)
